# Supplementary material
Source: PubMed Central journal article supplement (PMC4197071)

# Supplemental Figure 1

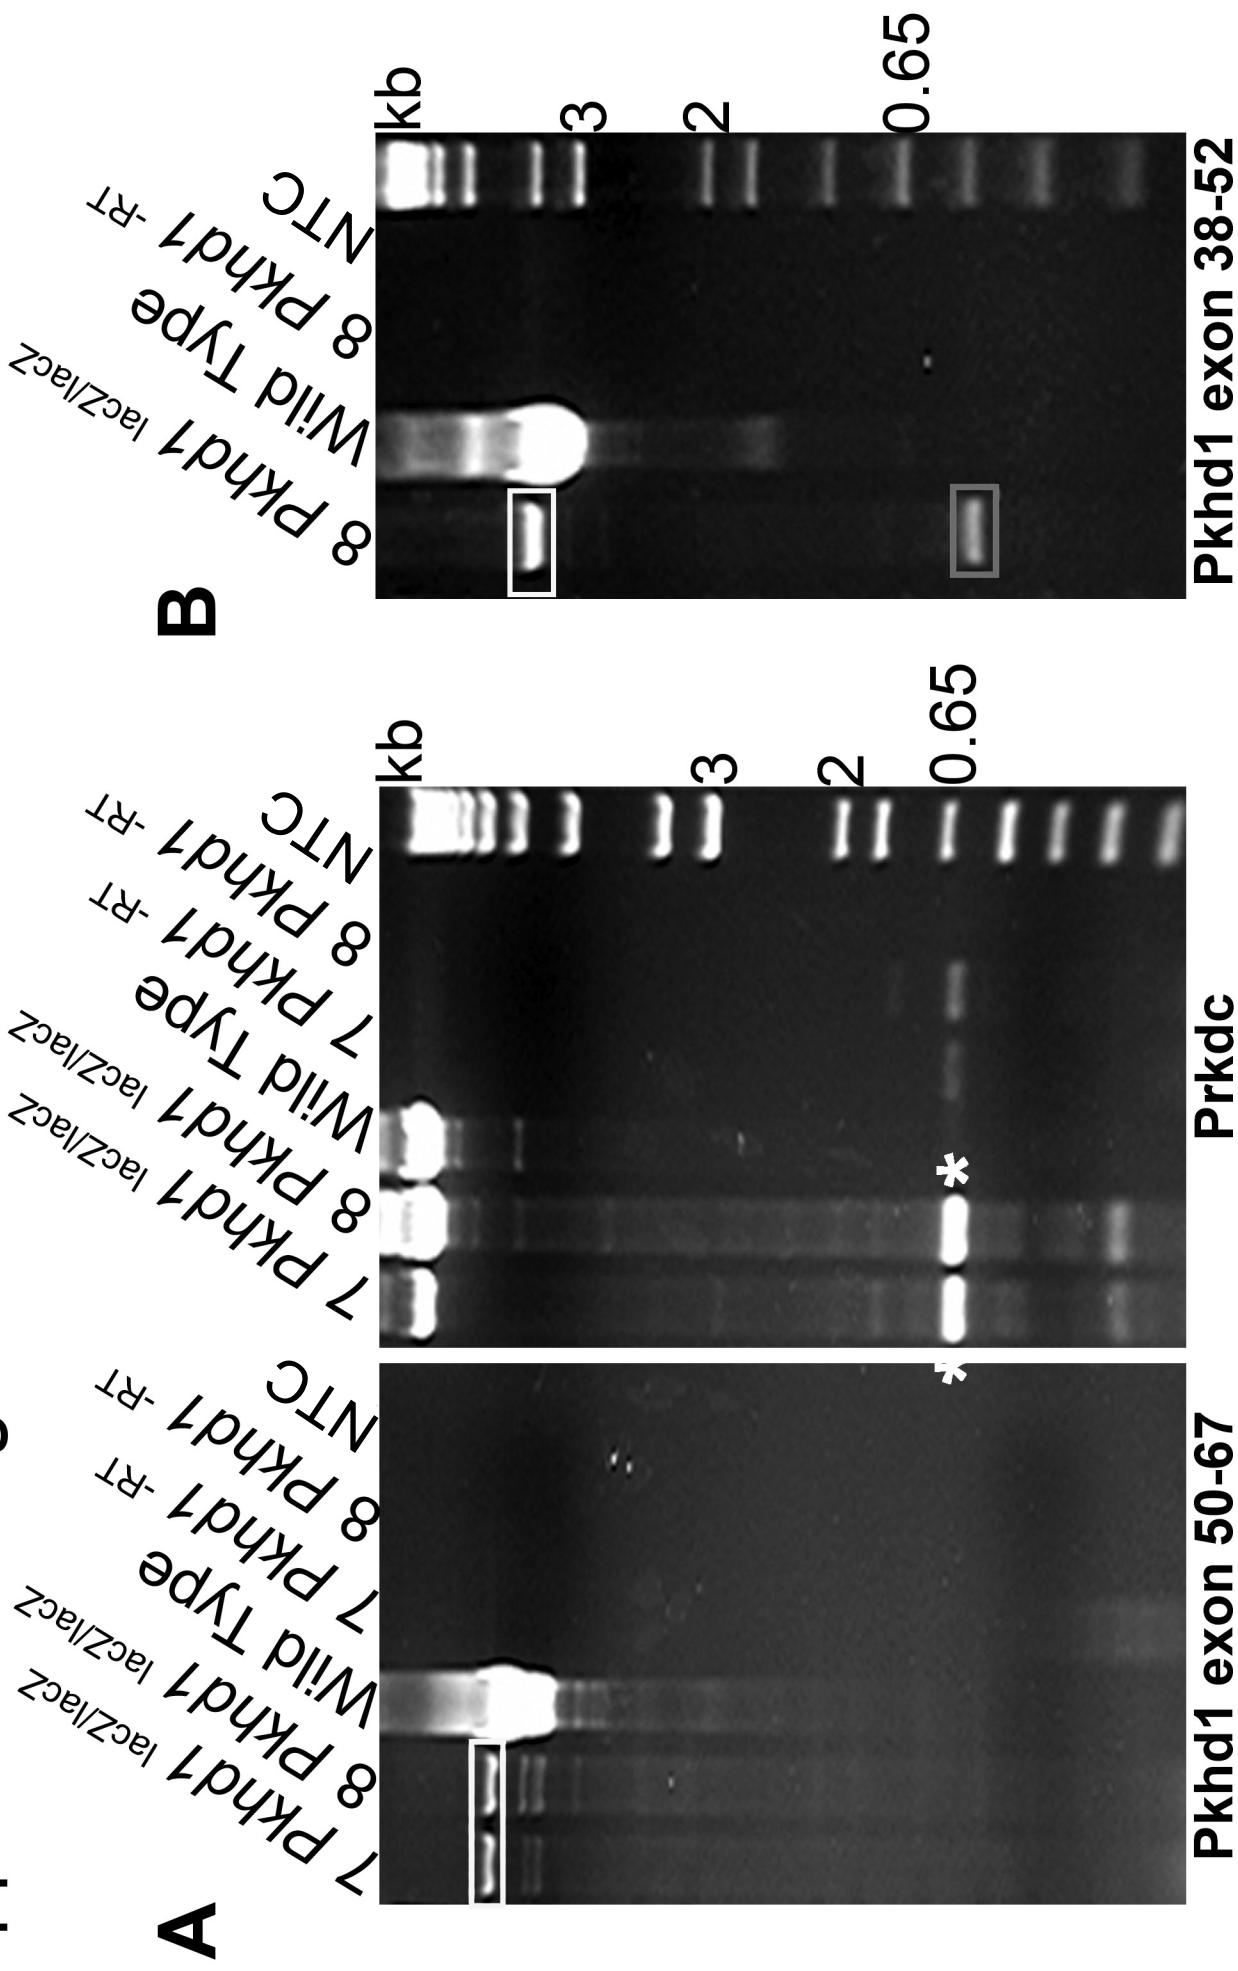

Supplement: NIHMS610608-supplement-2.pdf [file NIHMS610608-supplement-2.pdf]
